# Supplementary material for: Evolving enhancer-promoter interactions within the tinman complex of the flour beetle,Tribolium castaneum
Source: Oxford University Press journal article supplement (doi:10.1242/dev.038034), 2009-08-21

A

|        |               | 10                                                         | 20                           | 30 | 40 | 50 | 60 |
|--------|---------------|------------------------------------------------------------|------------------------------|----|----|----|----|
| DmMsh  | SNFVSASLLAD   | NRKPRTPFTTQQLLSLEKKFREKQYLSIAERA                           | EFSSSLRLTETQVKIWFQNRRAKAKRLQ |    |    |    |    |
| TcMsh1 | IS...E...SK   | .....A.....D.....                                          |                              |    |    |    |    |
| TcMsh2 | IS.....       | .....A.....D.....                                          |                              |    |    |    |    |
| AmMsh1 | IS...D...S.   | .....T.....H.....                                          |                              |    |    |    |    |
| AmMsh2 | LS...A....    | .....A.....T.R...V.....H.....M.                            |                              |    |    |    |    |
| DmTin  | TP...KDI.NM   | K...VL.SQA.V.E..CR..L.K..TG...EIIAQK.N.SA.....Y.S..GD      |                              |    |    |    |    |
| TcTin  | TP...KDI.NM   | K...VL.SQA.VYE..RR.KQOK...AP..EQMAQG.K..P.....Y.S..QT      |                              |    |    |    |    |
| AmTin  | TP...RDI.SE   | K...VL.SQN.VYE..QR.KQOR...AP..ELLAQT.K..S.....Y.N..AR      |                              |    |    |    |    |
| DmBap  | TP...INDI.TR  | KKRS.AA.SHA.VFE..RR.AQOR...GP..S.MAK.....Y.T..K.           |                              |    |    |    |    |
| TcBap  | TP...INDI.KH  | KKRS.AA..HA.VFE..RR.SQOR...GP..DLAQA.K.....Y...Y.T..K.     |                              |    |    |    |    |
| AmBap  | TP...I.DI.SR  | KKRS.AA.SHA.VYE..RR.AAQK...GP..DLARG.K.....YDKNDSF         |                              |    |    |    |    |
| DmLb1  | KS...I.DI.GR  | K...S..A..N..IFE...R.LYQK...P.D.D.IAGG.G.SNA..IT.....L..DM |                              |    |    |    |    |
| DmLbe  | KS...I.DI.GH  | K...S..A..NH.IFE...R.LYQK...P.D.D.IAA.G.SNA..IT.....Q..DI  |                              |    |    |    |    |
| TcLb   | KS...IVDI.NH  | K...S..A..NH.IFE...R.LYQK...P.D.D.IA..G.NA..IT.....L..DM   |                              |    |    |    |    |
| AmLb   | KS...ILD.I.SH | K...S..A..N..IFE...R.LYQK...P.D.D.IAAQ.G.SNA..IT.....L..DM |                              |    |    |    |    |
| DmC15  | LP...ISR..SK  | RK...S..RI.VAE...R.HKOK..AS...ALARG.KM.DA...T.....T.WR.QT  |                              |    |    |    |    |
| TcC15  | LP...ISN..GK  | RK...S..RL.IAE...R.HKOK..AS...ALAKT.KM.DA...T.....T.WR.QT  |                              |    |    |    |    |
| AmC15  | FF...IVE..IF  | RK...S..RL.IAE...R.HKOK..AS...ALAKT.KM.DA...T.....T.WR.QT  |                              |    |    |    |    |
| DmSlou | LA...ENI.DP   | P.RA..A..YE..VA..N..KTTR...VC..LNLAL..S.....T.W.KQN        |                              |    |    |    |    |
| TcSlou | LA...ENI.DP   | P.RA..A..YE..VA..N..KTTR...VC..LNLAL..S.....T.W.KQN        |                              |    |    |    |    |
| AmSlou | LA...ENI.DP   | P.RA..A..YE..VA..N..KTTR...VC..LNLAL..S.....T.W.KQN        |                              |    |    |    |    |
| DmHmx  | -----         | KK.T..V.SRA.VFQ..ST.DL.R...SS...GLAA.....N.W..QL           |                              |    |    |    |    |
| TcHmx  | T...IS.I.SR   | KK.T..V.SRS.VFQ..ST.DM.R...SS...GLAA..H.....N.W..QL        |                              |    |    |    |    |

TN domain

Homeodomain

B

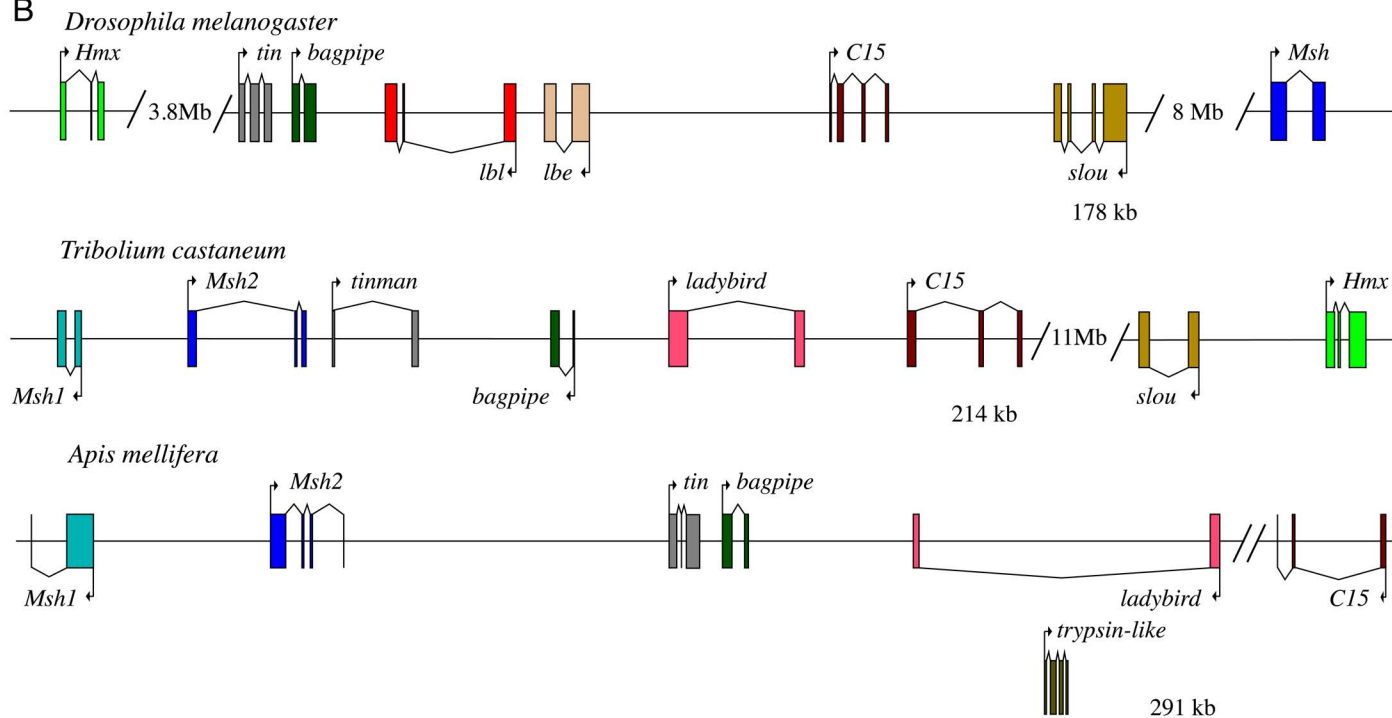

Supplement: dev038034-sup-038034-figs1.pdf [file dev038034-sup-038034-figs1.pdf]
