# Supplementary material for: Evolving enhancer-promoter interactions within the tinman complex of the flour beetle,Tribolium castaneum
Source: Oxford University Press journal article supplement (doi:10.1242/dev.038034), 2009-08-21

**A** binding site clusters in the *Tribolium C15* locus

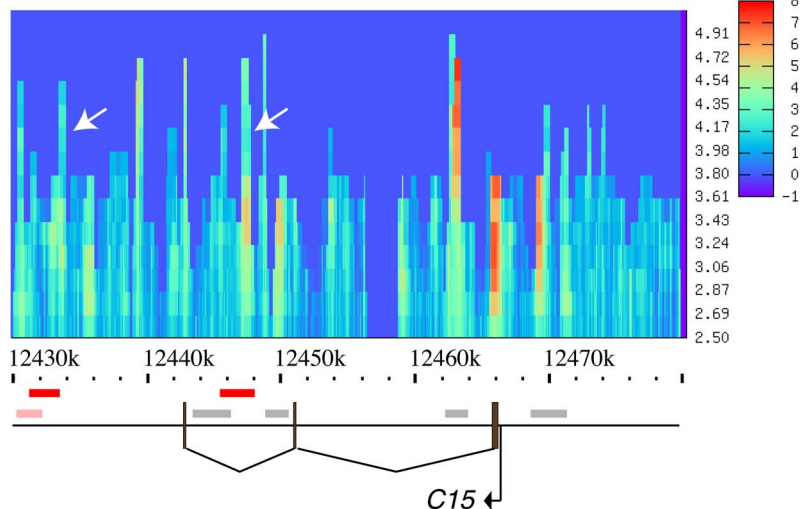

**B** binding site clusters in the *Tribolium ladybird* locus

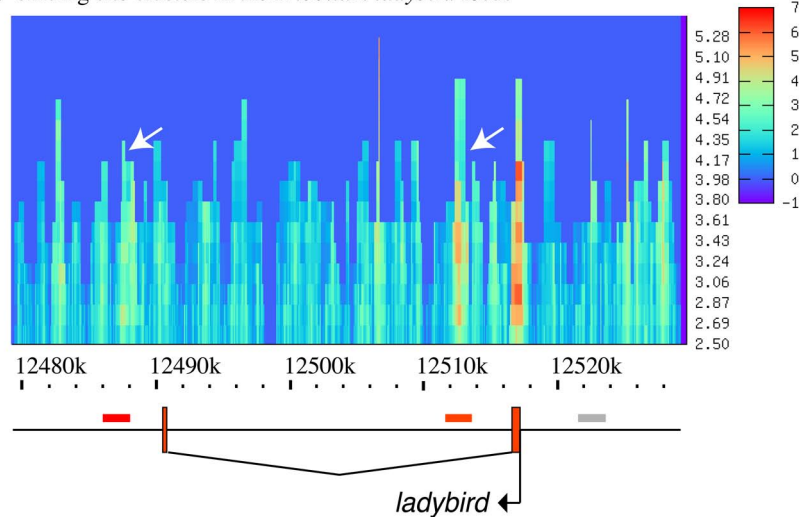

Supplement: dev038034-sup-038034-figs10.pdf [file dev038034-sup-038034-figs10.pdf]
