# Supplementary figures and images for: Evolving enhancer-promoter interactions within the tinman complex of the flour beetle,Tribolium castaneum
Source: Oxford University Press journal article supplement (doi:10.1242/dev.038034), 2009-08-21

*Tc C15 promoter, white*

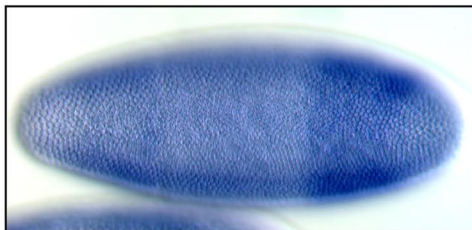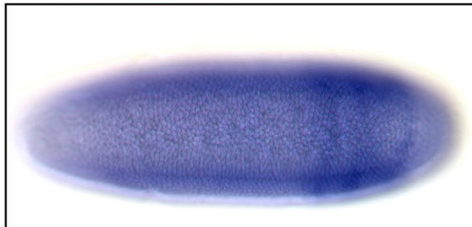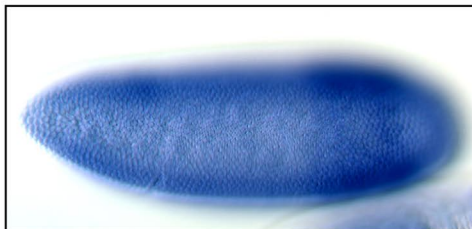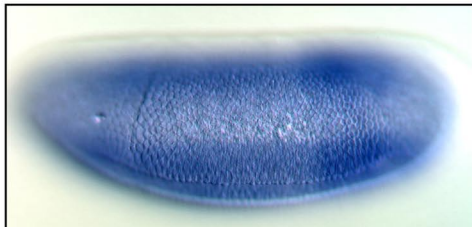

*Tc lb promoter, white*

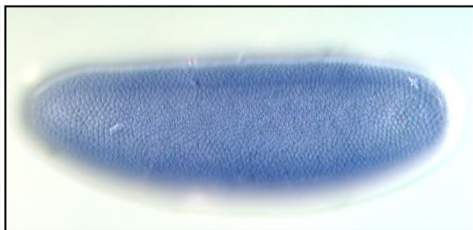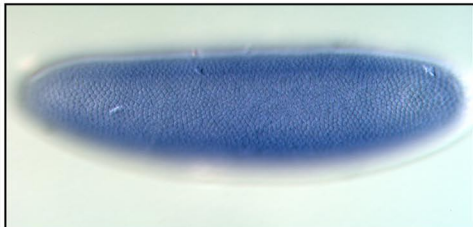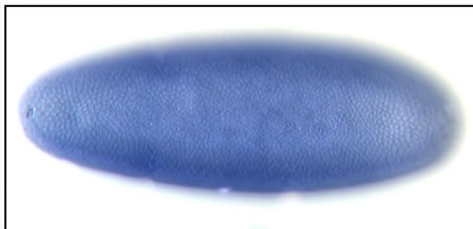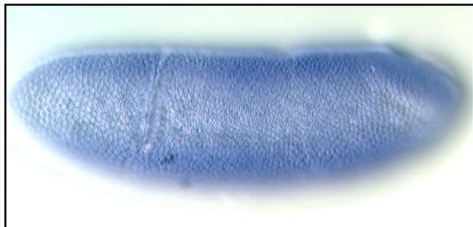

Supplement: dev038034-sup-038034-figs11.pdf [file dev038034-sup-038034-figs11.pdf]

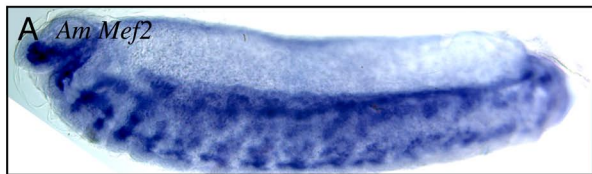

**B** *Am dorsocross*

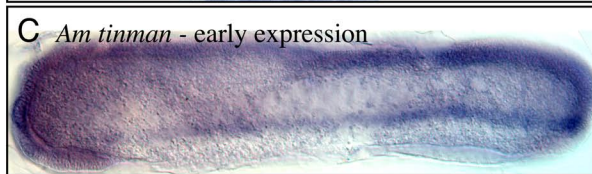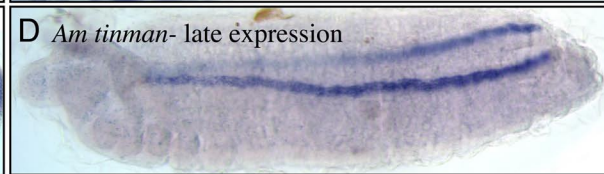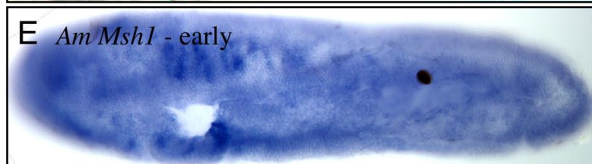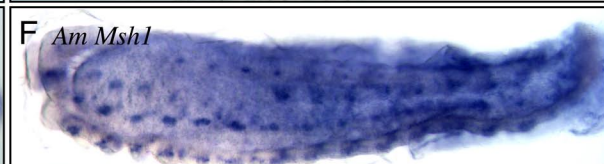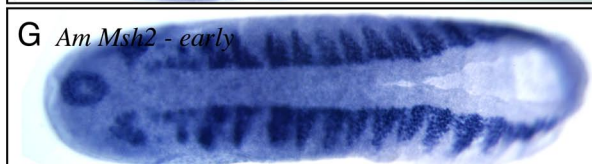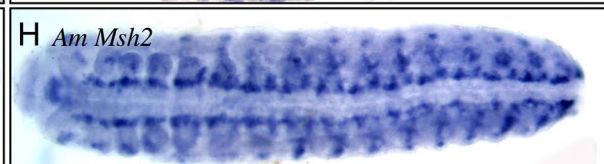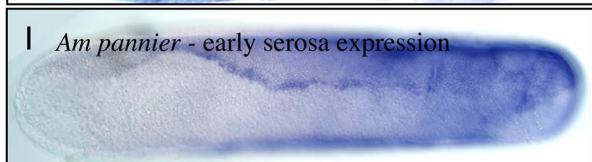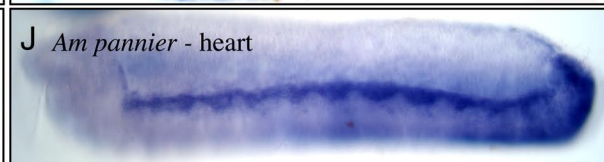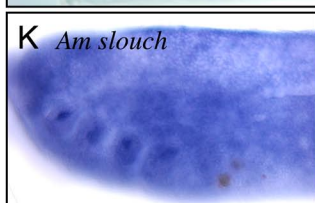

Supplement: dev038034-sup-038034-figs2.pdf [file dev038034-sup-038034-figs2.pdf]

**A** *Apis ladybird*

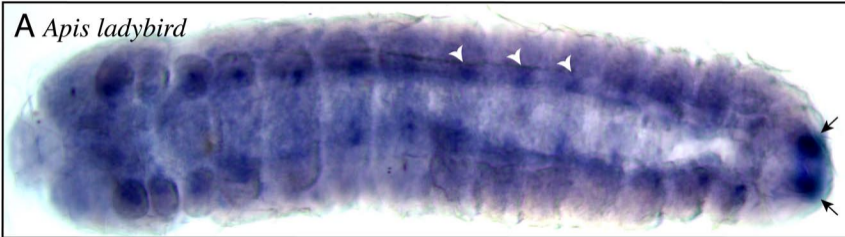

**B** *Apis ladybird*

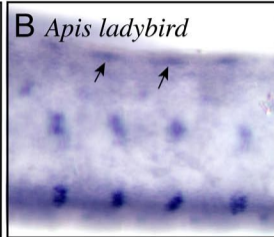

**C** *Apis C15*

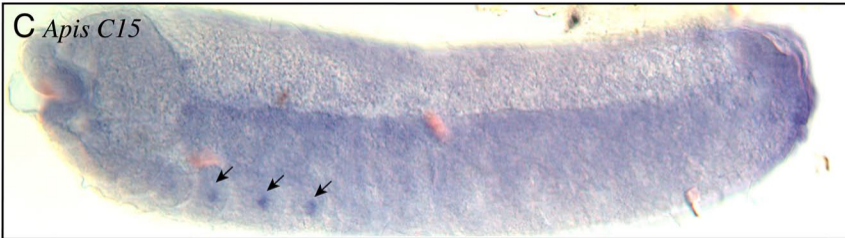

**D** *Apis C15*

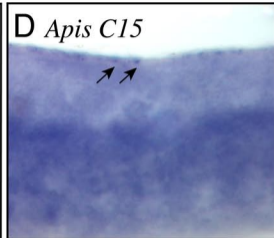

Supplement: dev038034-sup-038034-figs3.pdf [file dev038034-sup-038034-figs3.pdf]

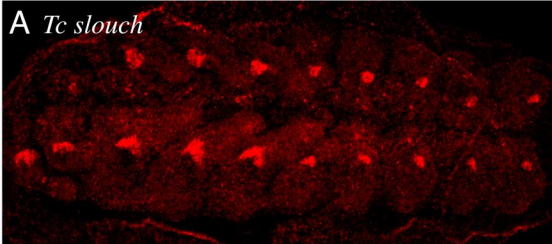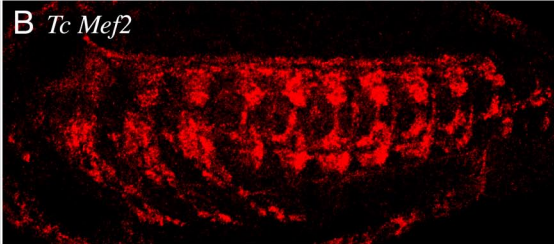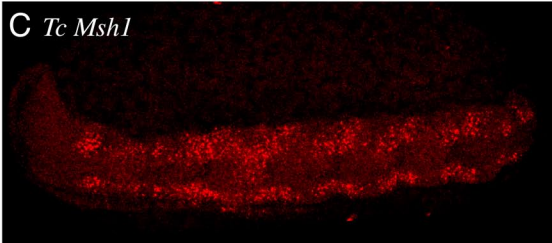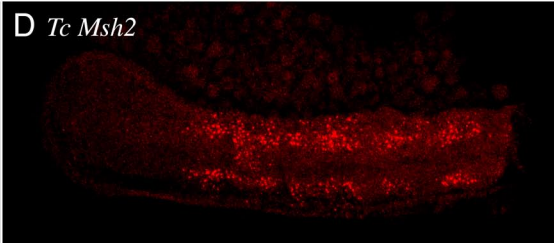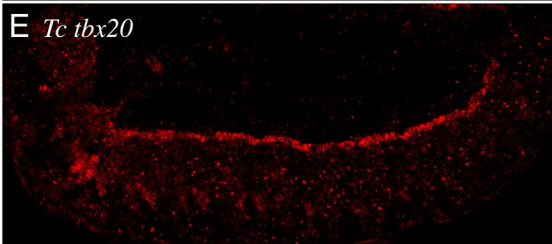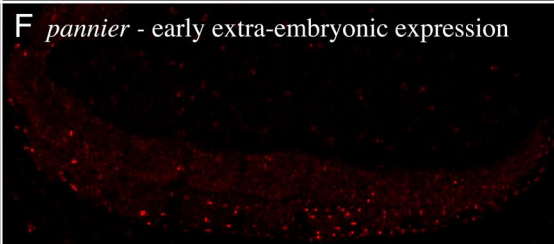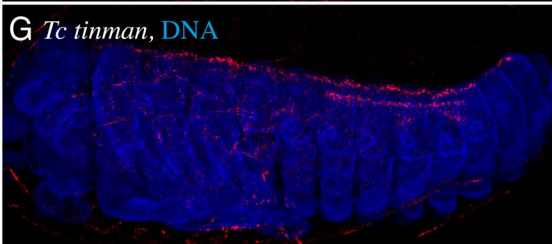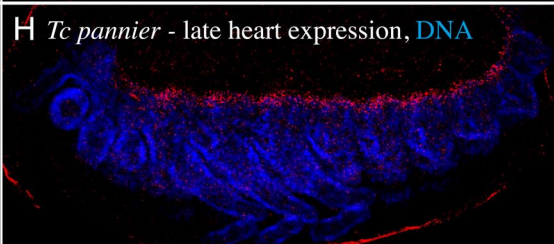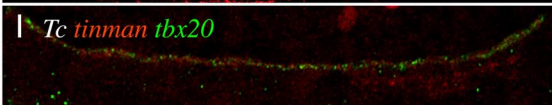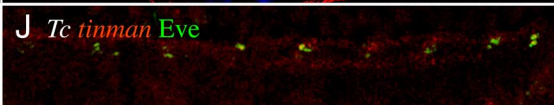

Supplement: dev038034-sup-038034-figs4.pdf [file dev038034-sup-038034-figs4.pdf]

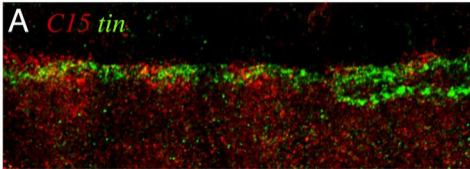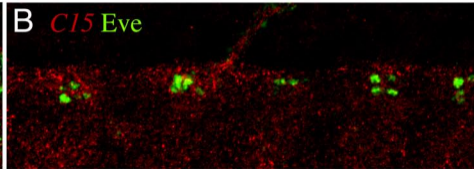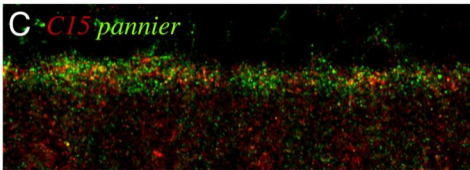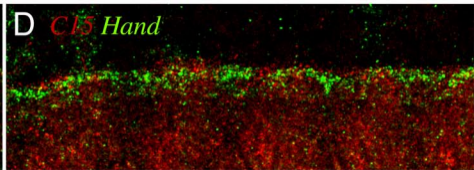

Supplement: dev038034-sup-038034-figs5.pdf [file dev038034-sup-038034-figs5.pdf]

**A** Control

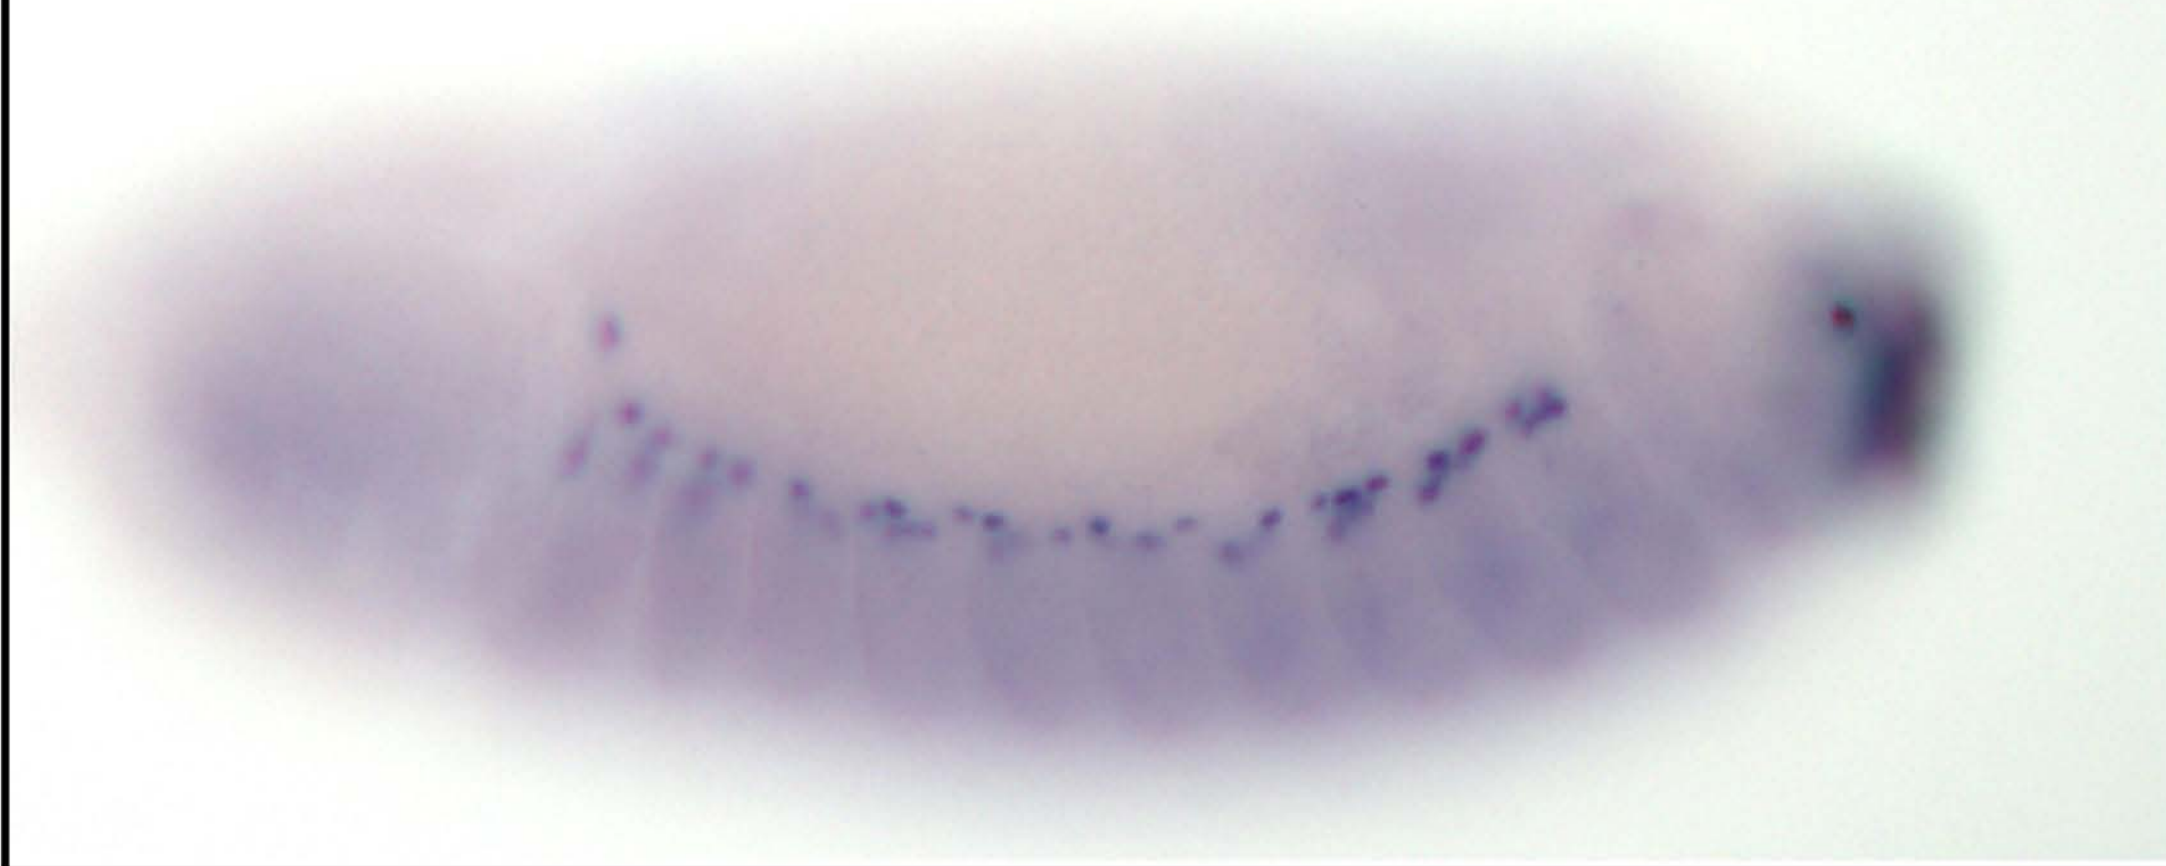

**B** *Tribolium* Ladybird

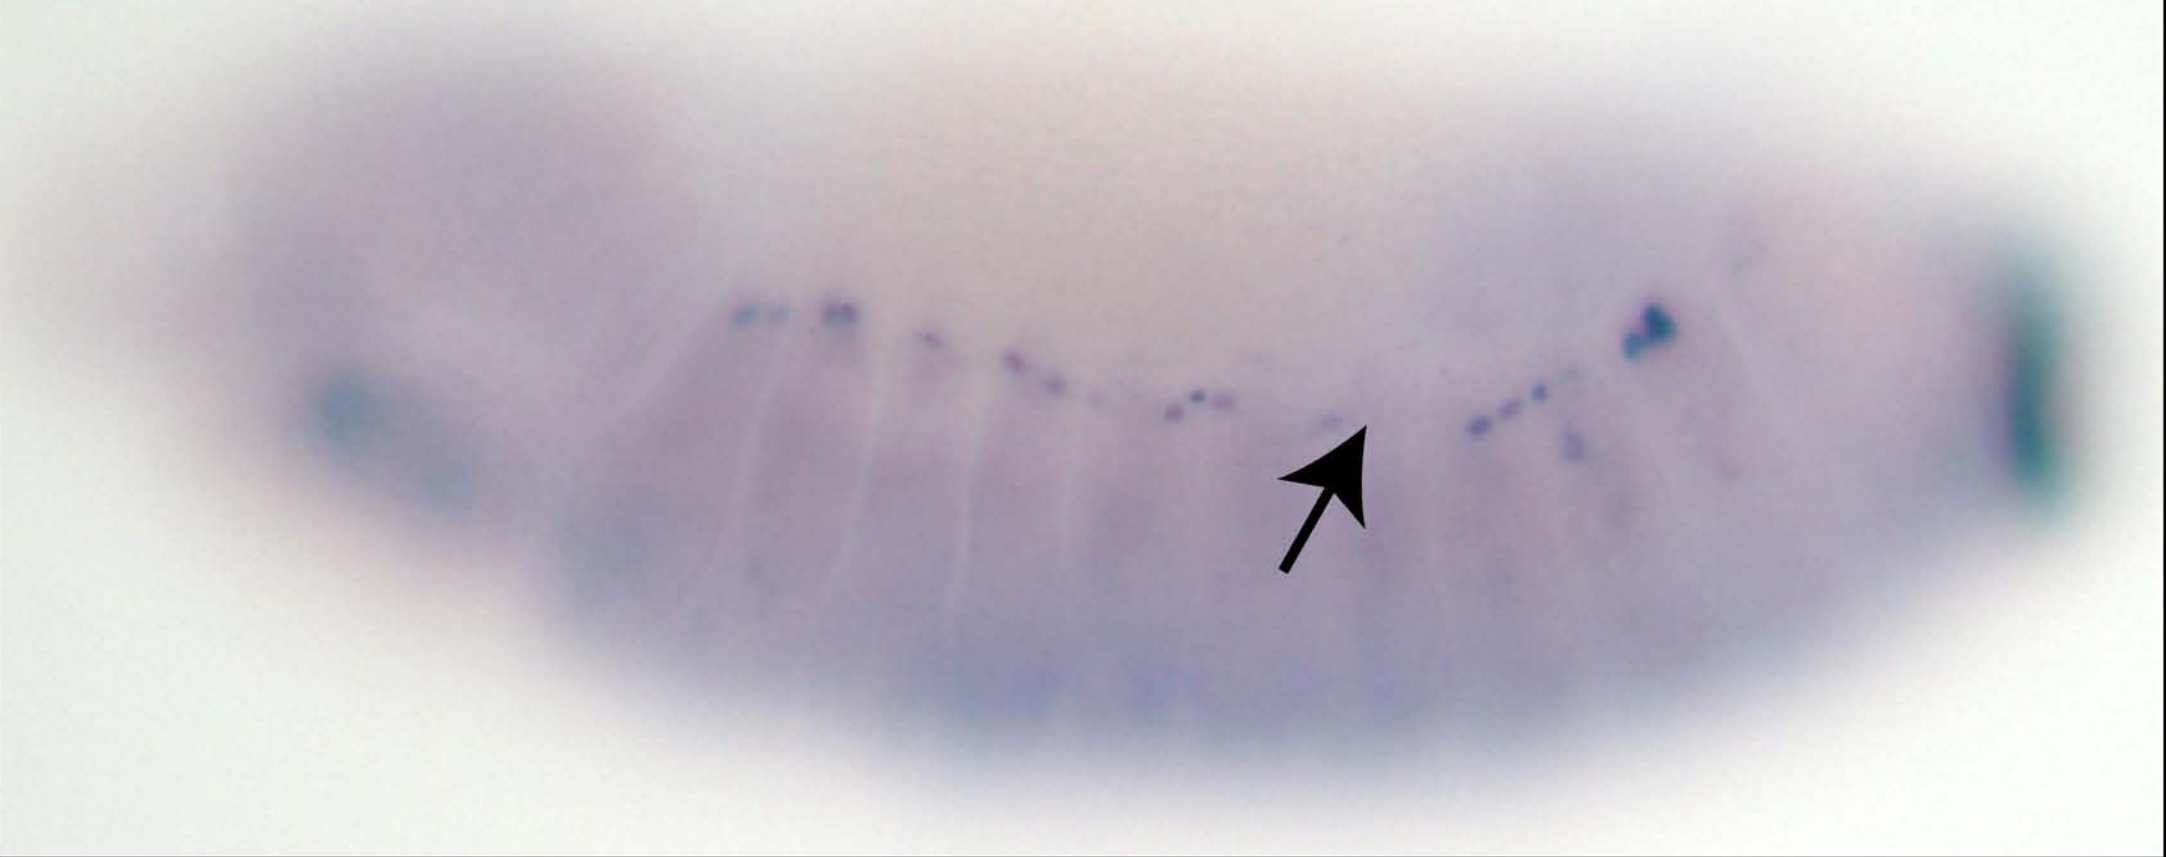

**C** *Drosophila* C15

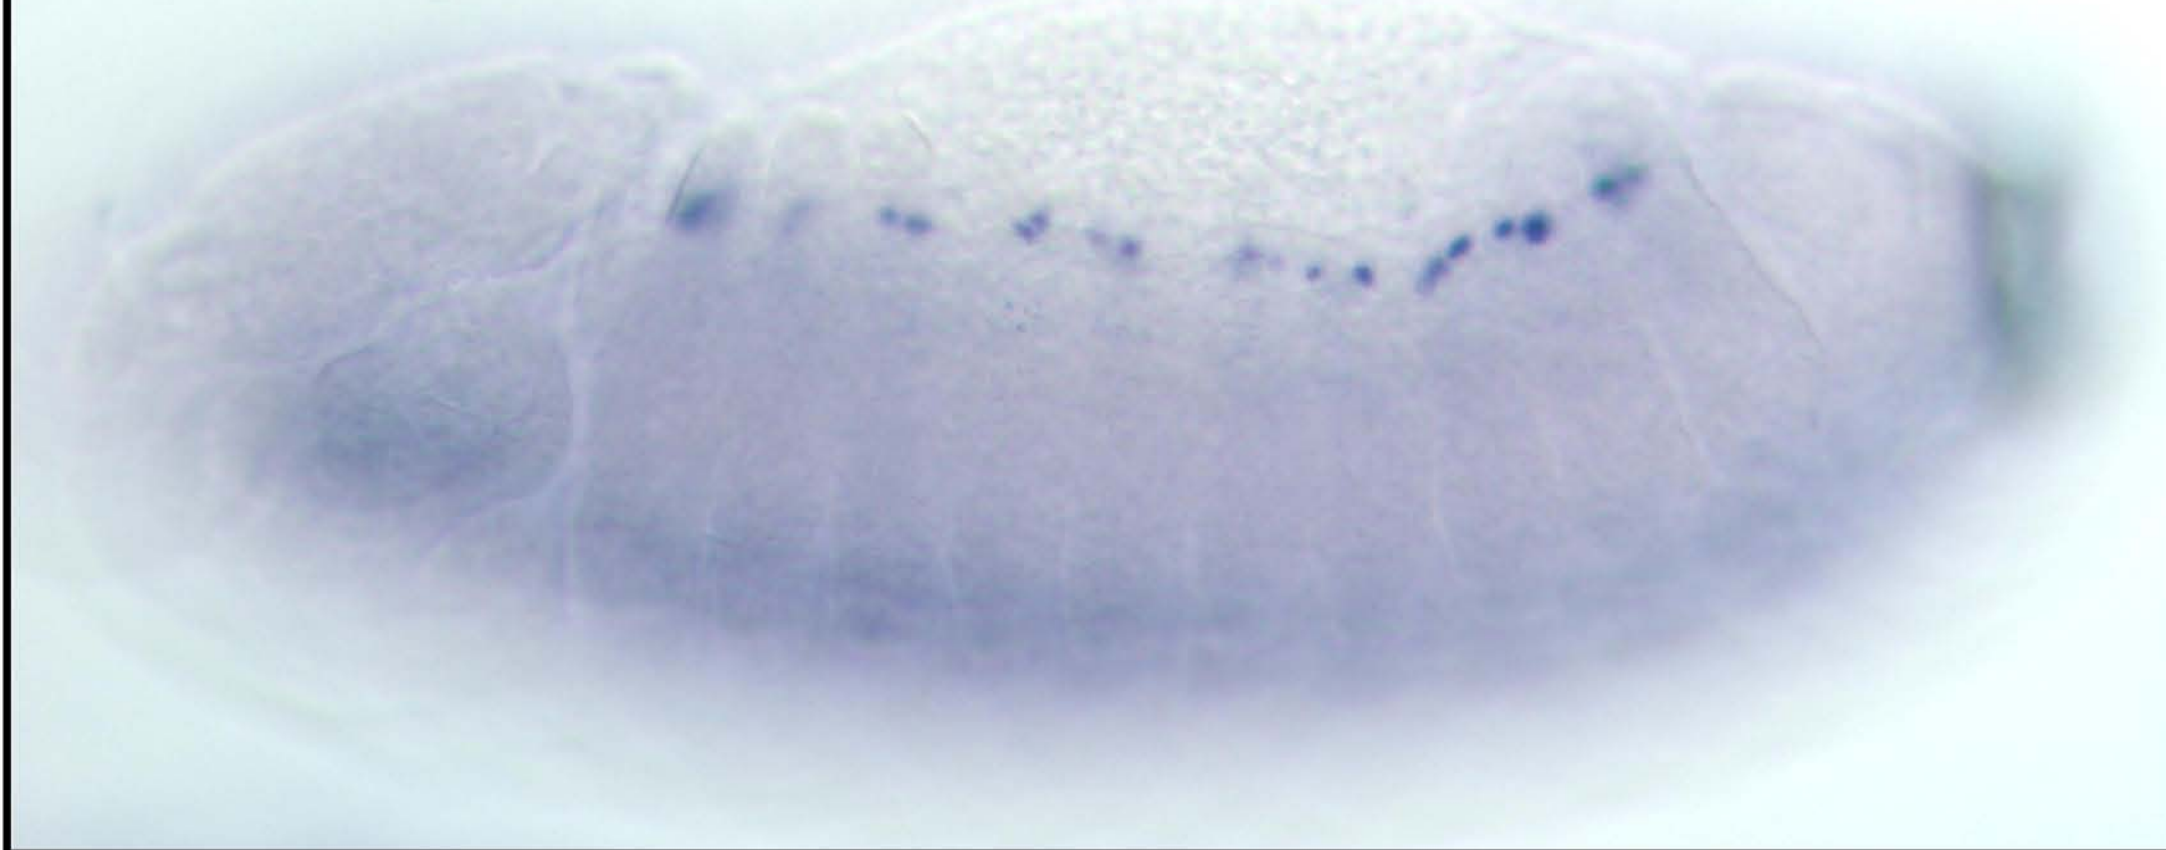

**D** *Tribolium* C15

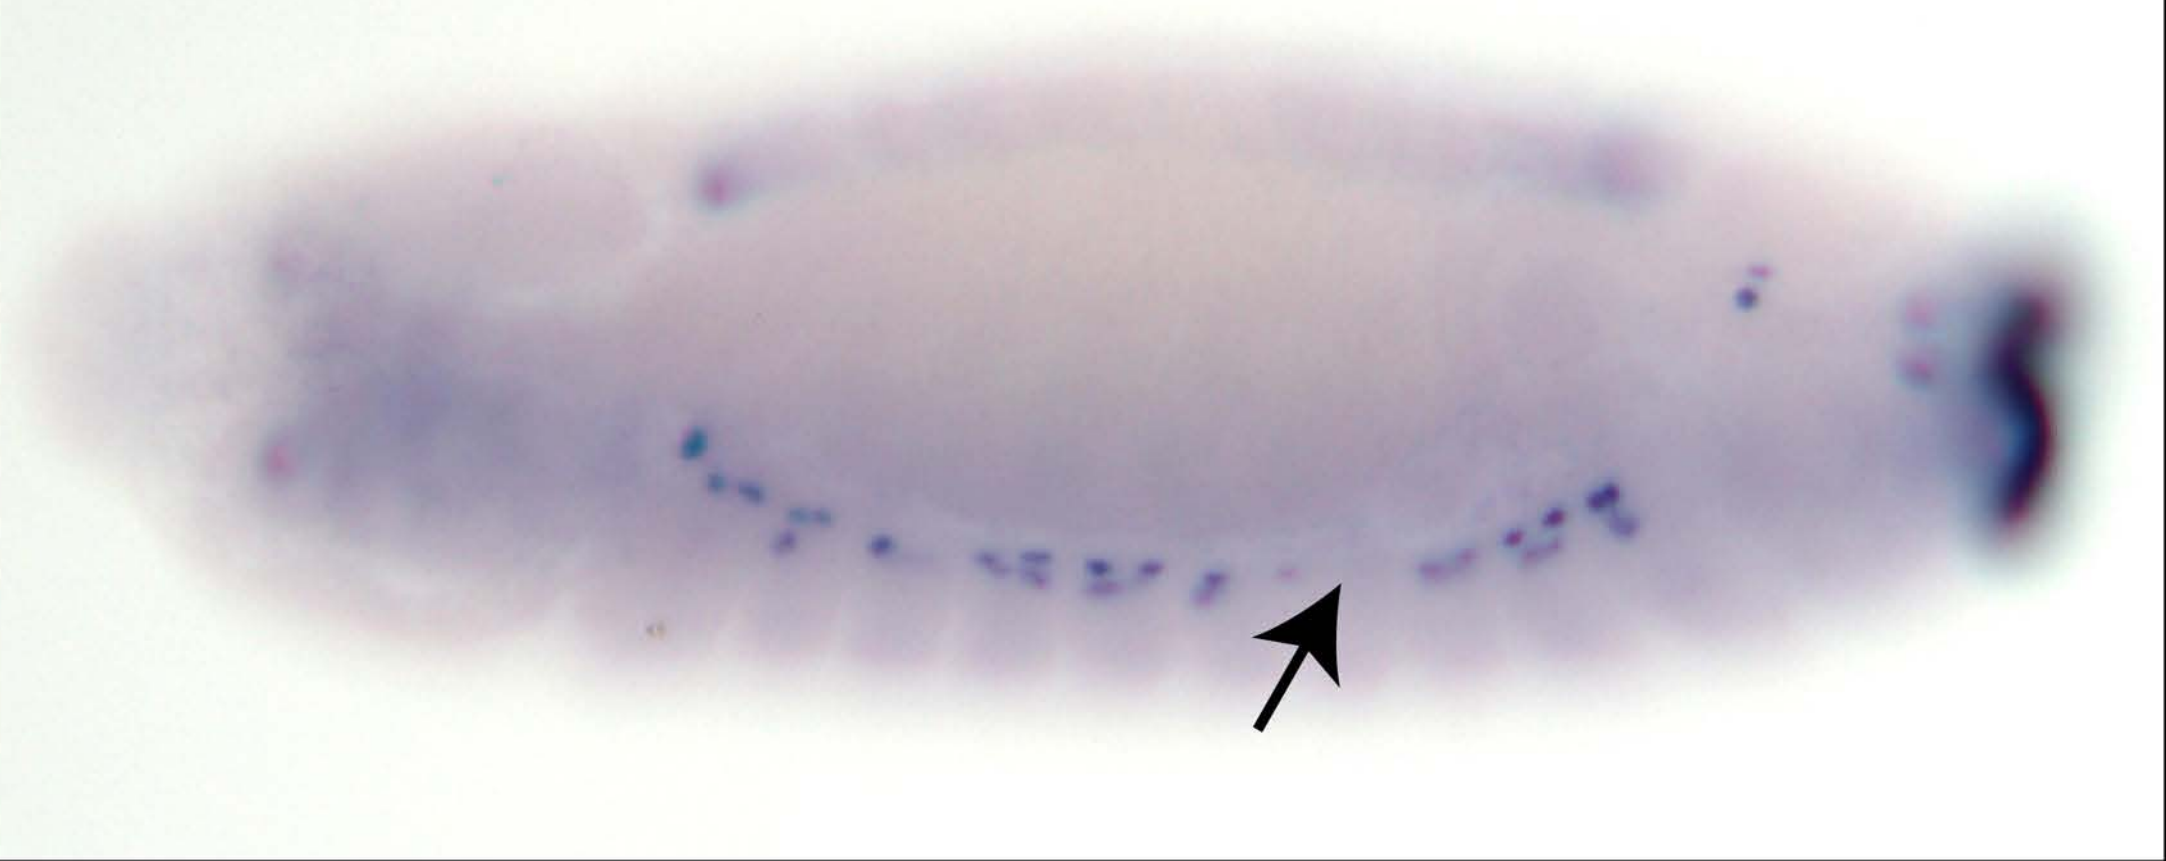

Supplement: dev038034-sup-038034-figs6.pdf [file dev038034-sup-038034-figs6.pdf]

**A** *Dm lbl* downstream (1) *LacZ* anti-Eve

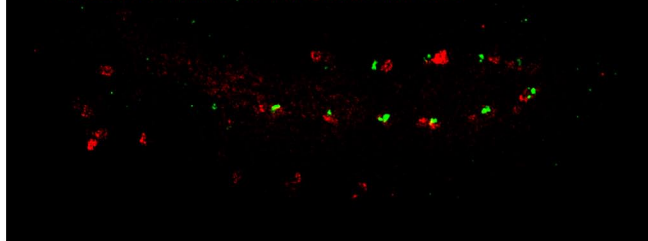

**B** *Dm lbl* intronic (2) *LacZ* anti-Eve

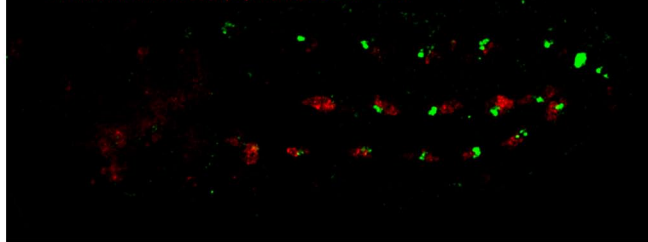

**C** *Tc C15* intronic (3) *LacZ*

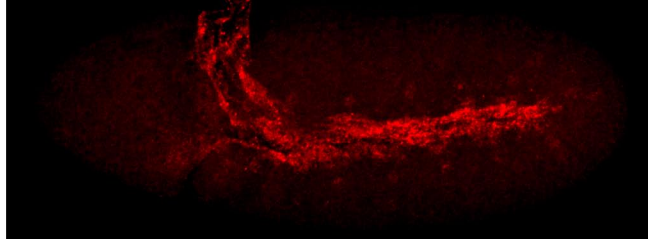

Supplement: dev038034-sup-038034-figs7.pdf [file dev038034-sup-038034-figs7.pdf]

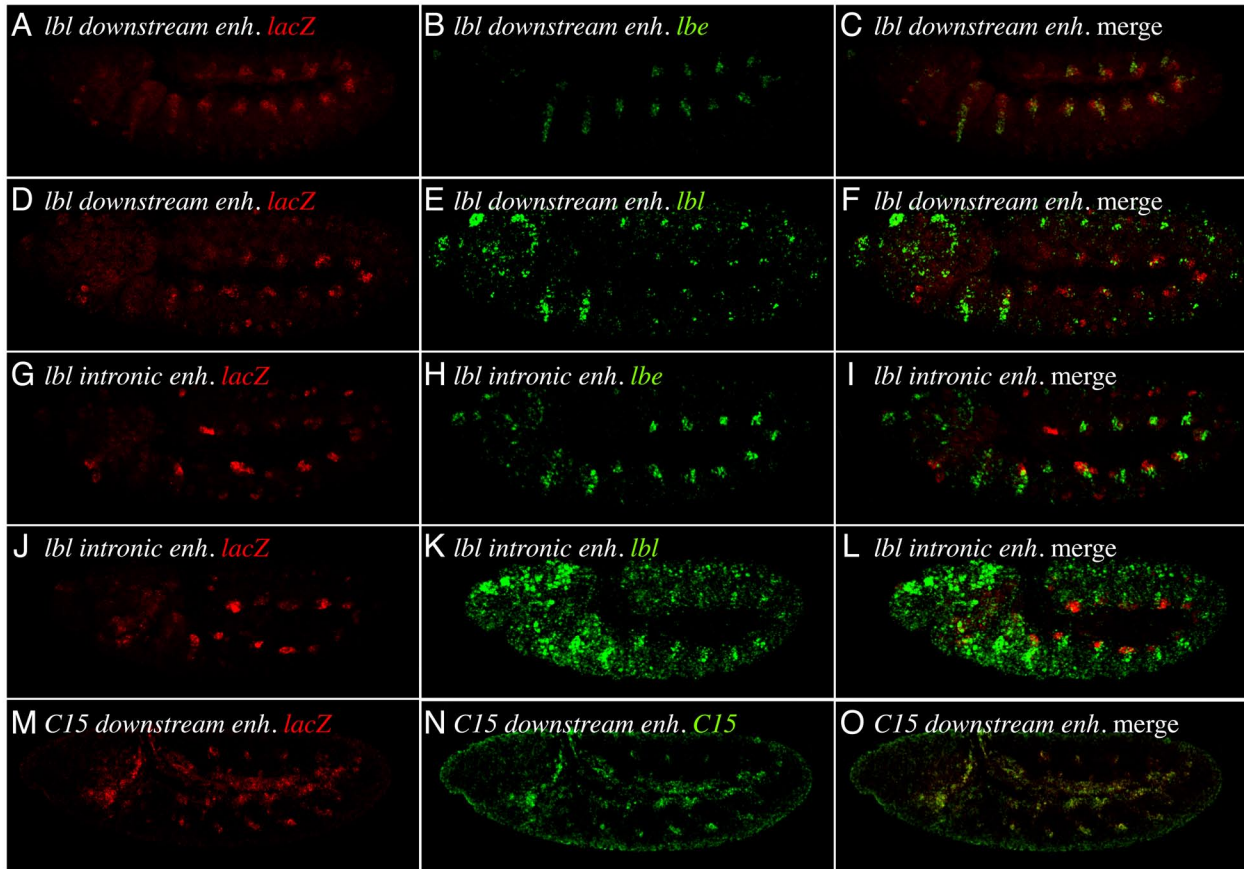

Supplement: dev038034-sup-038034-figs8.pdf [file dev038034-sup-038034-figs8.pdf]

**A** *wt; lbl downstream-LacZ*

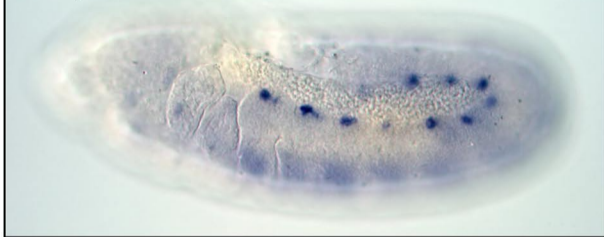

**B** *tin-/-; lbl downstream-LacZ*

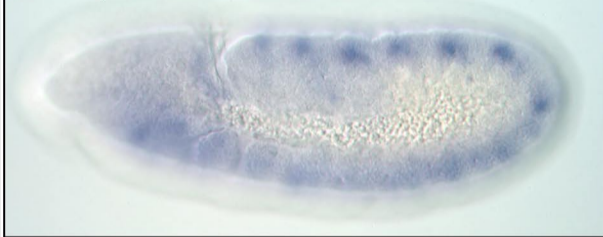

**C** *wt; lbl intronic-LacZ*

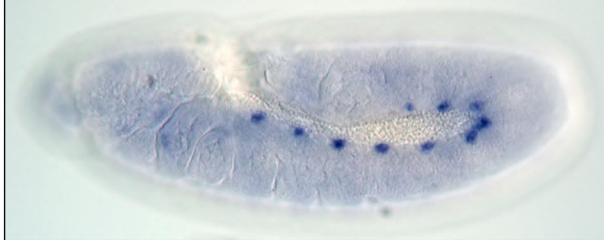

**D** *tin-/-; lbl intronic-LacZ*

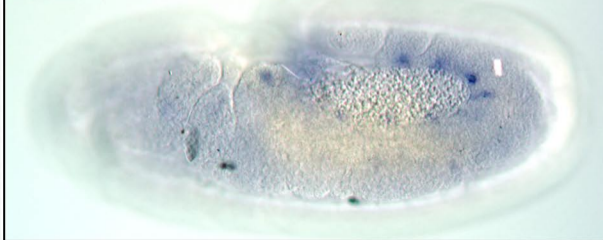

Supplement: dev038034-sup-038034-figs9.pdf [file dev038034-sup-038034-figs9.pdf]
